# Supplementary material for: Robust metal–organic framework with abundant large electronegative sites for removal of CO2 from a ternary C2H2/C2H4/CO2 mixture
Source: Royal Society of Chemistry journal article supplement (doi:10.1039/d2qi01175a), 2022-01-01
Supplement: d2qi01175a1.pdf [file d2qi01175a1.pdf]

## *Electronic Supplementary Information (ESI)*

### **Robust metal-organic framework with rich electronegative sites for removal of CO<sub>2</sub> from a ternary C<sub>2</sub>H<sub>2</sub>/C<sub>2</sub>H<sub>4</sub>/CO<sub>2</sub> mixture**

Cheng Xiong<sup>1†</sup>, Yan-Hong Xiao<sup>1†</sup>, Qingyou Liu<sup>2</sup>, Ling Chen<sup>1</sup>, Chun-Ting He<sup>1</sup>, Qing-Yan Liu<sup>1\*</sup> & Yu-Ling Wang<sup>1\*</sup>

<sup>1</sup>College of Chemistry and Chemical Engineering, Key Laboratory of Functional Small Molecules for Ministry of Education, Jiangxi Normal University, Nanchang 330022, China. <sup>2</sup>Institute of Geochemistry, Chinese Academy of Sciences, Guiyang 550081, China. † These authors contributed equally.

Corresponding Authors (email: ylwang@jxnu.edu.cn; qyliu@jxnu.edu.cn)

#### **1. Characterization.**

**Physical Measurements.** FT-IR spectra were recorded from KBr disc on a Perkin-Elmer Spectrum One FT-IR spectrometer ranging from 400 to 4000 cm<sup>-1</sup>. Thermogravimetric analyses were performed under a nitrogen atmosphere with a heating rate of 10 °C/min using a PE Diamond thermogravimetric analyser. Powder X-ray diffraction analyses were performed on a Rigaku Ultima IV diffractometer with Cu-Kα radiation ( $\lambda = 1.5418 \text{ \AA}$ ). Energy Dispersive X-Ray Spectroscopy was performed on a HITACHI S-3400N.

**Crystallographic Study.** X-ray single-crystal diffraction experiment was carried out a Rigaku Oxford SuperNova diffractometer equipped with an EOS detector (Mo-Kα radiation,  $\lambda = 0.71073 \text{ \AA}$ ). Absorption correction and data reduction were handled with a *CrysAlisPro package*.<sup>1</sup> The *SHELXT-2015*<sup>2</sup> and *SHELXL-2018*<sup>3</sup> were applied to structure solution and refinement. The two fluorine atoms of 2,5-difluoroterephthalic ligand were disordered over two positions. Thus the hydrogen atoms of the 2,5-difluoroterephthalic ligand couldn't be added. All other hydrogen atoms were modelled geometrically and refined with a riding model. Non-hydrogen atoms were refined anisotropically. The guest water and DMF molecules are highly disordered and treated by

*SQUEEZE* of *PLATON*.<sup>4</sup>

**Isosteric heat of adsorption.** The gas adsorption isotherms measured at 273 and 298 K were first fitted to a virial equation (equation S1) (Figure S7).<sup>5</sup> Then the  $Q_{st}$  values for C<sub>2</sub>H<sub>2</sub>, C<sub>2</sub>H<sub>4</sub> and CO<sub>2</sub> were calculated based on the fitting parameters using equation S2 (Figure S7d).

$$\ln P = \ln N + \frac{1}{T} \sum_{i=0}^m a_i N^i + \sum_{i=0}^n b_i N^i \quad (\text{equation S1})$$

$$Q_{st} = -R \sum_{i=0}^m a_i N^i \quad (\text{equation S2})$$

where  $P$  is pressure (mmHg),  $N$  is the adsorbed quantity (mmol g<sup>-1</sup>),  $T$  is the temperature (K),  $a_i$  and  $b_i$  are virial coefficients,  $R$  is the universal gas constant (8.314 J K<sup>-1</sup> mol<sup>-1</sup>), and  $m$  and  $n$  determine the number of coefficients required to adequately describe the isotherm.

**Ideal adsorbed solution theory (IAST) calculations of adsorption selectivity.** The IAST was used to predict mixed gas behavior from experimentally measured single-component isotherms.<sup>6</sup> The experimentally measured loadings for C<sub>2</sub>H<sub>2</sub>, C<sub>2</sub>H<sub>4</sub> and CO<sub>2</sub> in JXNU-14 were fitted with the single-site Langmuir model (equation S3 and Figure S9).

$$q = q_{A,sat} \frac{b_A p}{1 + b_A p} \quad (\text{equation S3})$$

Where  $p$  (unit: kPa) is the pressure of the bulk gas at equilibrium with the adsorbed phase,  $q$  (unit: mmol g<sup>-1</sup>) is the adsorbed amount per mass of adsorbent,  $q_{A,sat}$  (unit: mmol g<sup>-1</sup>) is the saturation capacity,  $b_A$  (unit: 1/kPa) is the affinity coefficient.

The adsorption selectivity for binary mixture (A and B) using the Langmuir fitting parameters is defined by equation S4.

$$S_{ads} = \frac{q_A/q_B}{y_A/y_B} \quad (\text{equation S4})$$

(where the  $q_A$  and  $q_B$  represent the molar loadings (mmol g<sup>-1</sup>). The  $y_A$  and  $y_B$  ( $y_B = 1 - y_A$ ) are the mole fractions in a bulk fluid mixture).

**Breakthrough separation experiments.** The breakthrough curves were measured on a homemade apparatus for the binary C<sub>2</sub>H<sub>2</sub>/CO<sub>2</sub> ( $v:v = 1:1$ ) and C<sub>2</sub>H<sub>2</sub>/CO<sub>2</sub> ( $v:v = 1:1$ ) and the ternary C<sub>2</sub>H<sub>2</sub>/C<sub>2</sub>H<sub>4</sub>/CO<sub>2</sub> ( $v:v:v = 1:1:1$ ) at 298 K and 1 bar. The gas flows were controlled at the inlet by a mass flow meter as 2 mL min<sup>-1</sup> for the binary mixtures or 3 mL min<sup>-1</sup> for the ternary mixtures and a gas chromatograph (TCD-Thermal Conductivity Detector) continuously monitored the effluent

gas from the adsorption bed. Prior to every breakthrough experiment, we activated the sample by flushing the adsorption bed with helium gas for 1 hours at 298 K. Subsequently, the column was allowed to equilibrate at the measurement rate before we switched the gas flow

**Table S1.** Crystal structure refinement data.

|                                                                |  |  |  |
|----------------------------------------------------------------|-----------------------------------------------------------------------------------|-------------------------------------------------------------------------------------|-------------------------------------------------------------------------------------|
|                                                                | C <sub>2</sub> H <sub>2</sub>                                                     | C <sub>2</sub> H <sub>4</sub>                                                       | CO <sub>2</sub>                                                                     |
| Molecule size (Å <sup>3</sup> )                                | 3.32 × 3.34 × 5.7                                                                 | 3.3 × 4.2 × 4.8                                                                     | 13.18 × 3.33 × 5.36                                                                 |
| Boiling point (K)                                              | 188.4                                                                             | 169.4                                                                               | 194.7                                                                               |
| Dipole moment (e.s.u. cm)                                      | 0                                                                                 | 0                                                                                   | 0                                                                                   |
| Quadrupole moment (×10 <sup>-26</sup> e.s.u. cm <sup>2</sup> ) | 3.00                                                                              | 1.50                                                                                | 4.30                                                                                |
| Polarizability (×10 <sup>-25</sup> cm <sup>3</sup> )           | 33.3-39.3                                                                         | 42.52                                                                               | 29.11                                                                               |
| Kinetic diameter (Å)                                           | 3.300                                                                             | 4.163                                                                               | 3.300                                                                               |

**Table S2.** Crystal structure refinement data.

| <b>JXNU-14</b> |                                                                                               |
|----------------|-----------------------------------------------------------------------------------------------|
| formula        | C <sub>42</sub> H <sub>18</sub> N <sub>6</sub> O <sub>13</sub> F <sub>6</sub> Fe <sub>3</sub> |
| fw             | 1096.17                                                                                       |
| temp (K)       | 293(2) K                                                                                      |
| Radiation      | Mo-Kα (0.71073 Å)                                                                             |
| cryst syst     | hexagonal                                                                                     |
| Space group    | <i>P</i> 6 <sub>3</sub> / <i>mmc</i>                                                          |
| <i>Z</i>       | 2                                                                                             |
| <i>a</i> (Å)   | 16.7482(3)                                                                                    |
| <i>b</i> (Å)   | 16.7482(3)                                                                                    |
| <i>c</i> (Å)   | 15.2933(6)                                                                                    |
| <i>α</i> (deg) | 90                                                                                            |
| <i>β</i> (deg) | 90                                                                                            |

|                                                      |           |
|------------------------------------------------------|-----------|
| $\gamma$ (deg)                                       | 120       |
| $V$ ( $\text{\AA}^3$ )                               | 3715.1(2) |
| $D_{\text{calcd}}$ ( $\text{g}\cdot\text{cm}^{-3}$ ) | 0.980     |
| $\mu$ ( $\text{mm}^{-1}$ )                           | 0.636     |
| no. of reflns collected                              | 9894      |
| independent reflns                                   | 1456      |
| $F(000)$                                             | 1096      |
| $R_{\text{int}}$                                     | 0.0316    |
| $R_1$ ( $I > 2\sigma(I)$ ) <sup>a</sup>              | 0.0895    |
| $wR_2$ ( $I > 2\sigma(I)$ ) <sup>a</sup>             | 0.2447    |
| CCDC number                                          | 2166003   |

It should be noted that the counter ions of hydroxide ions are not included into the formula.

$$^a R_1 = \frac{\sum||F_o| - |F_c||}{\sum|F_o|} \text{ and } wR_2 = \left\{ \frac{\sum[w(F_o^2 - F_c^2)^2]}{\sum[w(F_o^2)^2]} \right\}^{1/2}$$

## 2. Results and discussion

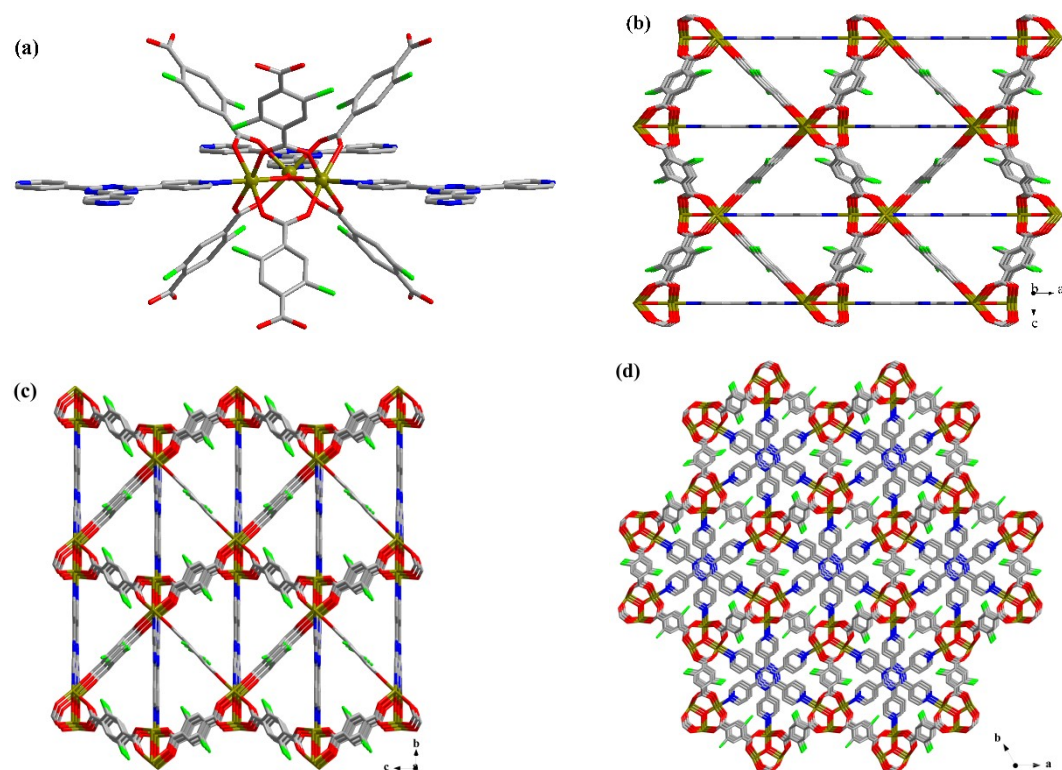

**Fig. S1** (a) The trimeric  $[\text{Fe}_3(\mu_3\text{-O})]$  cluster is surrounded by six DFBDC<sup>2-</sup> and three TPT ligands. (b-d) 3D structure of JXNU-14 showing the 1D channels with triangular aperture (Hydrogen atoms are not shown. Fluorine atoms represent as green lines).

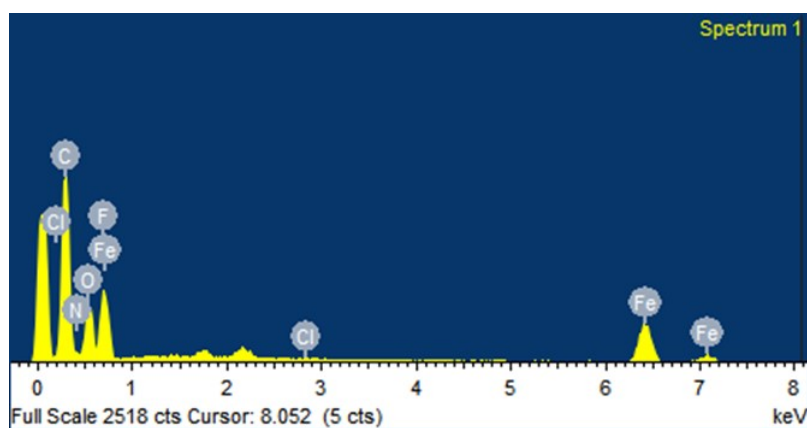

| Element | Weight% | Atomic% |
|---------|---------|---------|
| C K     | 45.37   | 56.26   |
| N K     | 7.18    | 7.63    |
| O K     | 21.54   | 20.06   |
| F K     | 17.65   | 13.84   |
| Cl K    | 0.03    | 0.01    |
| Fe K    | 8.23    | 2.20    |
| Totals  | 100.00  |         |

**Fig. S2** Energy dispersive X-ray spectroscopy of JXNU-14.

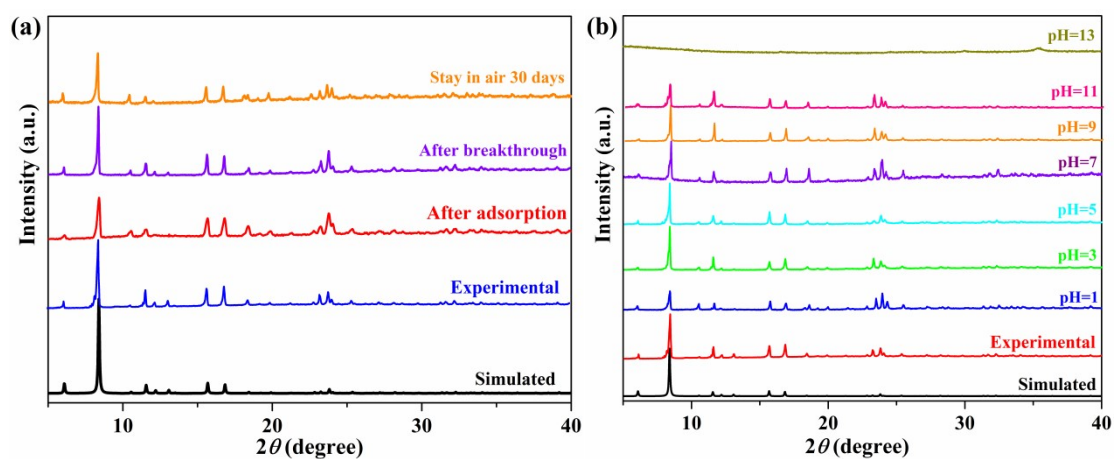

**Fig. S3** (a) PXRD patterns of JXNU-14. (b) PXRD patterns of JXNU-14 soaking in aqueous solutions with different pH values.

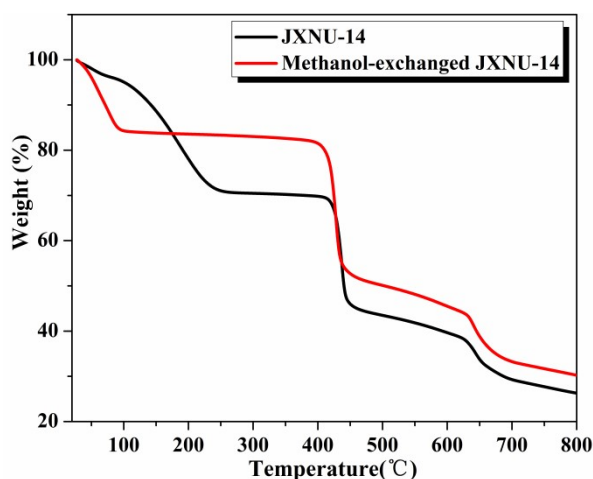

Fig. S4 TGA curves of JXNU-14.

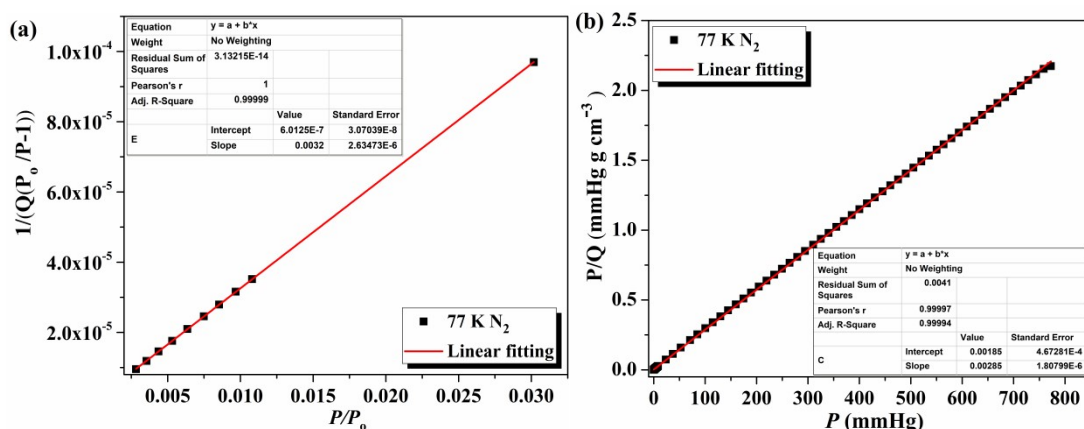

$$S_{\text{BET}} = (6.023 \times 10^{23} \times 0.162 \times 10^{-18}) / ((6.0125 \times 10^{-7} + 0.0032) \times 22414) = 1361 \text{ m}^2 \text{g}^{-1}$$

$$S_{\text{Langmuir}} = (6.023 \times 10^{23} \times 0.162 \times 10^{-18}) / (22414 \times 0.00285) = 1527 \text{ m}^2 \text{g}^{-1}$$

Fig. S5 BET surface area plot (a) and Langmuir surface area plot (b) for JXNU-14.

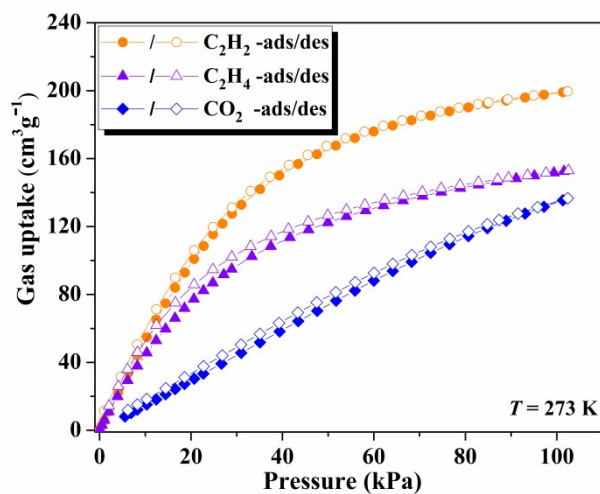

Fig. S6 Adsorption isotherms of JXNU-14 at 273 K.

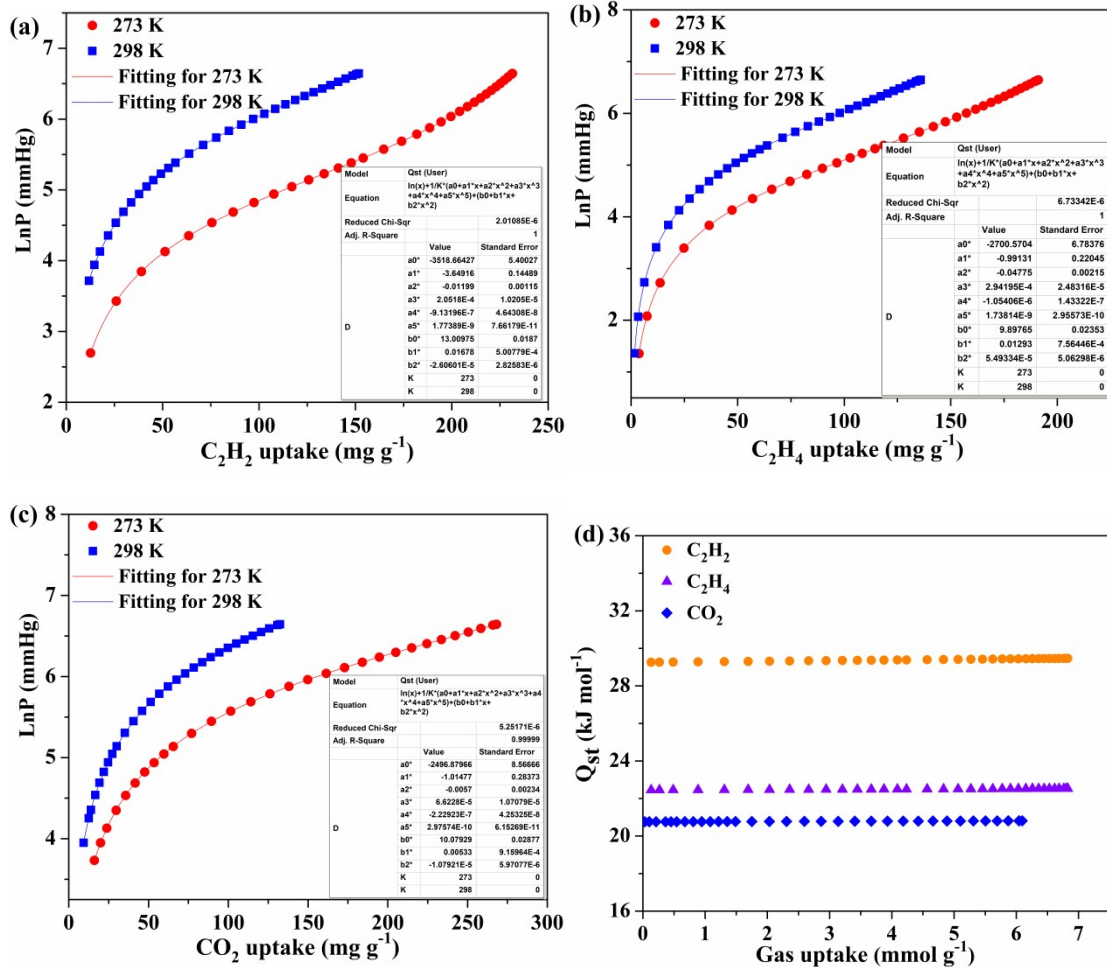

**Fig. S7** Virial fits of C<sub>2</sub>H<sub>2</sub> (a), C<sub>2</sub>H<sub>4</sub> (b) and CO<sub>2</sub> (c) isotherms and (d)  $Q_{st}$  for C<sub>2</sub>H<sub>2</sub>, C<sub>2</sub>H<sub>4</sub> and CO<sub>2</sub> in JXNU-14.

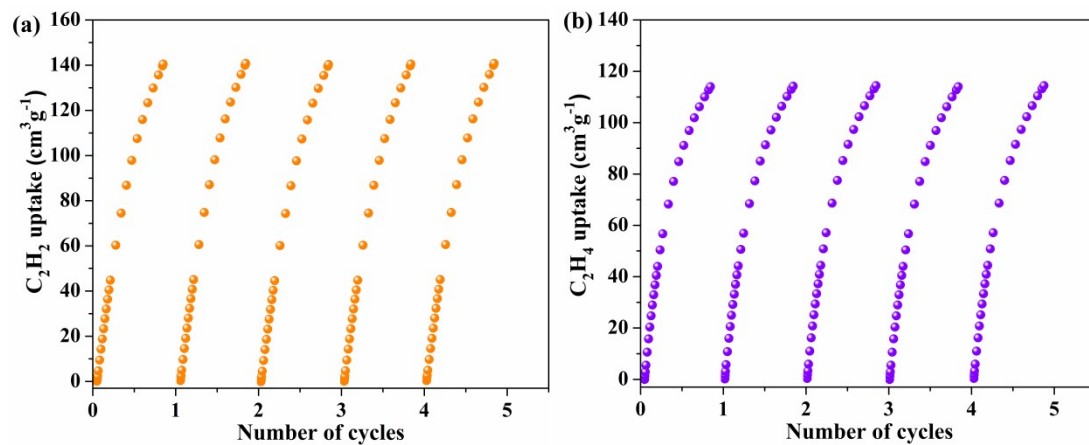

**Fig. S8** Cycles of (a) C<sub>2</sub>H<sub>2</sub> and (b) C<sub>2</sub>H<sub>4</sub> adsorption for JXNU-14 at 298 K.

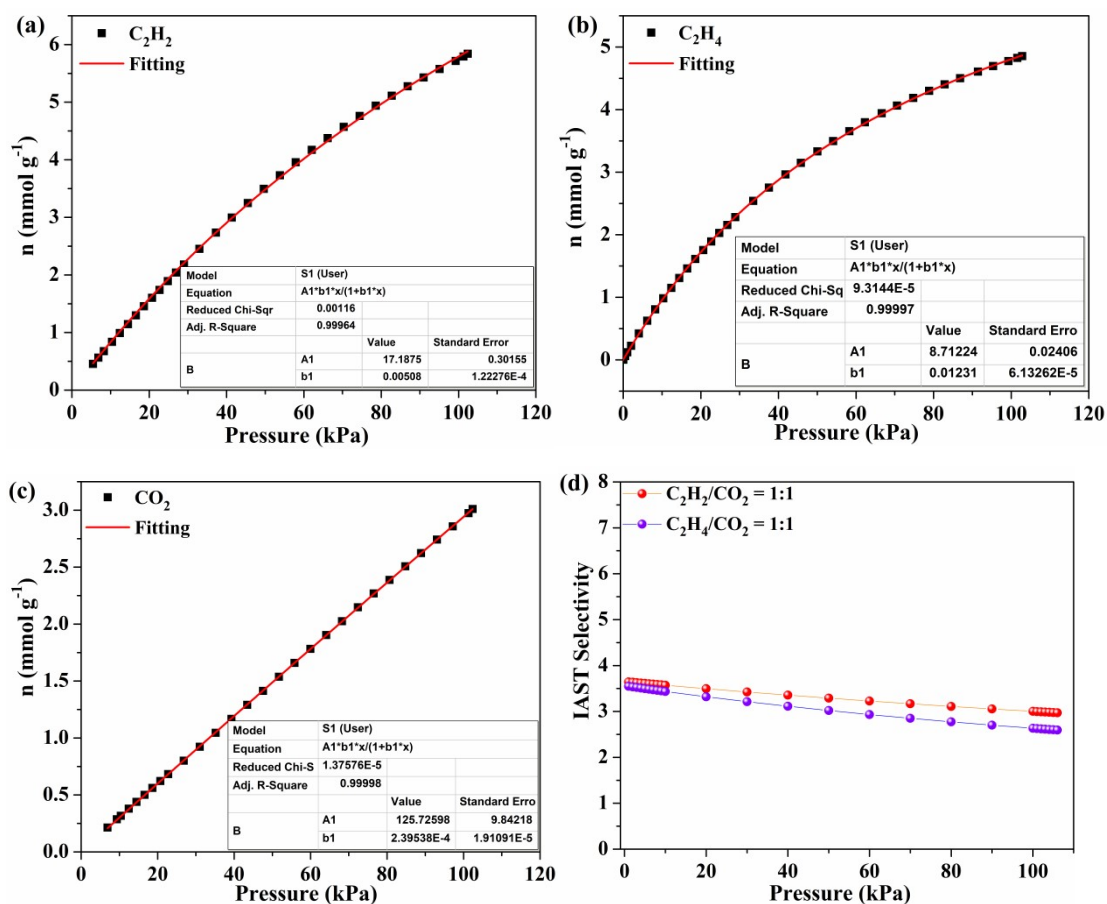

**Fig. S9** The graphs of the single-site Langmuir equation fit for adsorption of  $C_2H_2$  (a),  $C_2H_4$  (b) and  $CO_2$  (c) at 298 K on JXNU-14. (d) IAST selectivity for JXNU-14 at 298 K.

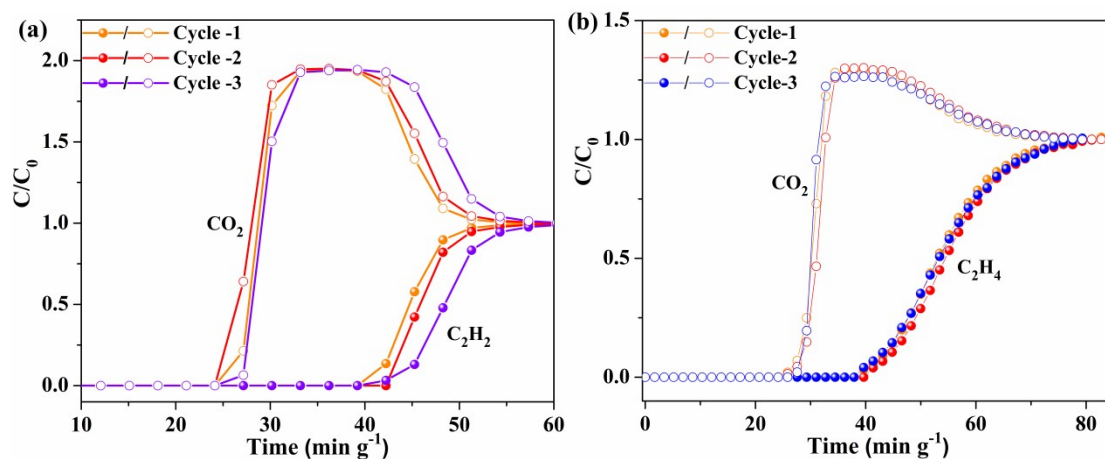

**Fig. S10** The cycling breakthrough tests for (a)  $C_2H_2/CO_2$  (1:1) and (b)  $C_2H_4/CO_2$  (1:1) with JXNU-14 (total gas flow: 2 mL  $min^{-1}$ ).



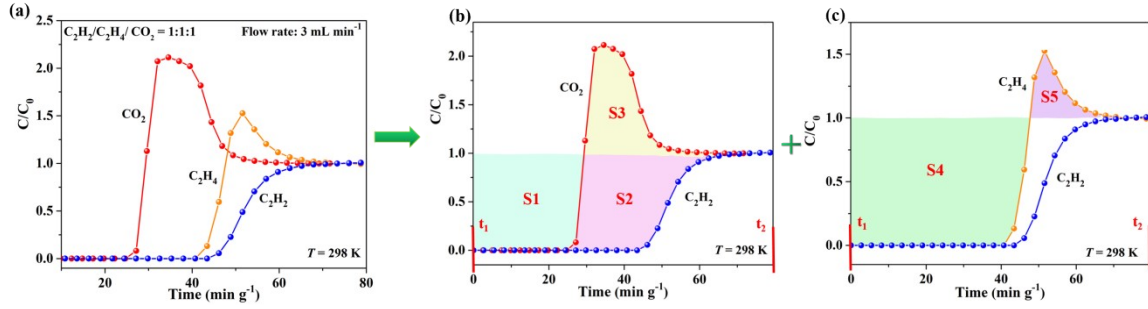

The capture amount ( $Q_1$ , mmol g<sup>-1</sup>) of C<sub>2</sub>H<sub>2</sub> during  $t_0$  to  $t_1$  is calculated as:

$$Q_1 = \frac{v \times V\%}{24.5 \times m} \int_{t_0}^{t_1} (c_0 - c_i) dt = \frac{v \times V\%}{24.5 \times m} (S1 + S2)$$

$v$  refers to the total flow rate of the gas mixture,  $V\%$  refers to the molar fraction of C<sub>2</sub>H<sub>2</sub>, and  $m$  refers to the mass of the adsorbent.

The captured amounts of CO<sub>2</sub> ( $Q_2$ , mmol g<sup>-1</sup>) and C<sub>2</sub>H<sub>4</sub> ( $Q_3$ , mmol g<sup>-1</sup>) during  $t_0$  to  $t_1$  can be similarly calculated as

$$Q_2 = \frac{v \times V\%}{22.4 \times m} (S1 - S3) \quad Q_3 = \frac{v \times V\%}{22.4 \times m} (S4 - S5)$$

**Fig. S11** The breakthrough curves of C<sub>2</sub>H<sub>2</sub>/C<sub>2</sub>H<sub>4</sub>/CO<sub>2</sub> (1:1:1) for JXNU-14 at 298 K.

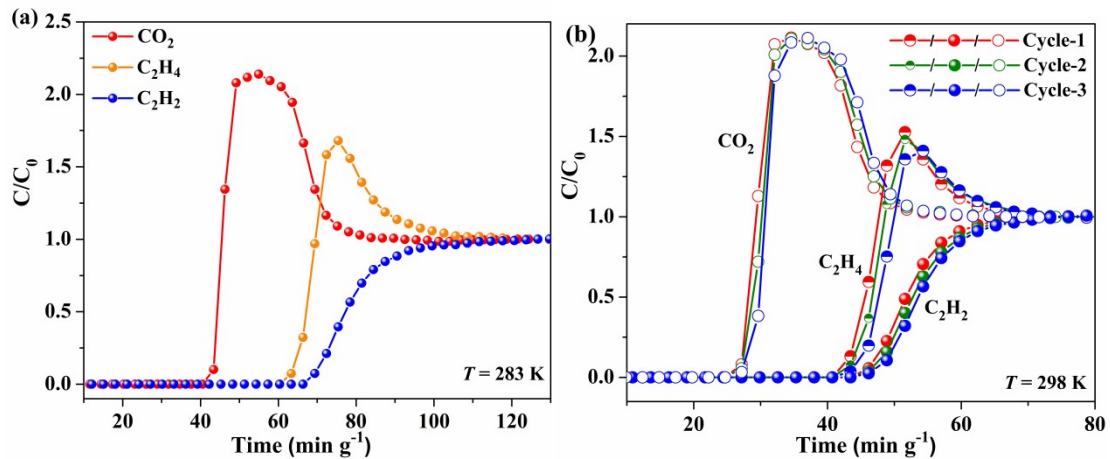

**Fig. S12** (a) Breakthrough curves for C<sub>2</sub>H<sub>2</sub>/C<sub>2</sub>H<sub>4</sub>/CO<sub>2</sub> (1:1:1) mixture with JXNU-14. (b) Cycling breakthrough experiments for JXNU-14 based on C<sub>2</sub>H<sub>2</sub>/C<sub>2</sub>H<sub>4</sub>/CO<sub>2</sub> (1:1:1) mixture (total gas flow: 3 mL min<sup>-1</sup>)

**Table S3.** Summary of adsorption uptakes (298 K and 1 bar) and IAST selectivities (C<sub>2</sub>H<sub>2</sub>/CO<sub>2</sub>=1:1) at 1 bar and 298 K for MOFs mentioned in main text.

| Compounds | C <sub>2</sub> H <sub>2</sub> uptake (cm <sup>3</sup> g <sup>-1</sup> ) | CO <sub>2</sub> uptake (cm <sup>3</sup> g <sup>-1</sup> ) | S <sub>ads</sub> | Ref. |
|-----------|-------------------------------------------------------------------------|-----------------------------------------------------------|------------------|------|
| JNU-1     | 62.1                                                                    | 50.3                                                      | 3.0              | 7    |
| SNNU-63   | 91.1                                                                    | 43.7                                                      | 2.7              | 8    |

|            |       |      |      |                  |
|------------|-------|------|------|------------------|
| FJU-6-TATB | 110.0 | 58.0 | 3.1  | 9                |
| UTSA-68a   | 70.1  | 39.6 | 3.4  | 10               |
| JXNU-14    | 137.5 | 67.4 | 2.97 | <b>This work</b> |

**Table S4.** Summary of adsorption uptakes (298 K and 1 bar) and IAST selectivities ( $C_2H_4/CO_2=1:1$ ) at 1 bar and 298 K for MOFs mentioned in main text.

| Compounds       | $C_2H_4$ uptake ( $cm^3 g^{-1}$ ) | $CO_2$ uptake ( $cm^3 g^{-1}$ ) | $S_{ads}$ | Ref.             |
|-----------------|-----------------------------------|---------------------------------|-----------|------------------|
| SNNU-95         | 15.3                              | 14.7                            | 2.4       | 11               |
| ZJNU-120(Sm)    | 52.7                              | 33.9                            | 2.4       | 12               |
| MOF-74(Zn)      | 132.3                             | 124.2                           | 3.3       | 13               |
| $Ni_2(m-dobdc)$ | 145.6                             | 156.8                           | 4.1       | 14               |
| UTSA-74         | 103.8                             | 90.5                            | 5.4       | 15               |
| JXNU-14         | 110.1                             | 67.4                            | 2.6       | <b>This work</b> |

## References

- 1 CrysAlisPro, Rigaku Oxford Diffraction: The Woodlands, TX. 2015.
- 2 G. M. Sheldrick *Acta Crystallogr Sect A Found Adv*, 2015, **A71**, 3–8.
- 3 G. M. Sheldrick. *Acta Crystallogr Sect C Struct Chem*, 2015, **C71**, 3–8.
- 4 Spek AL. PLATON: A Multipurpose Crystallographic Tool; Utrecht University: Utrecht, The Netherlands. 2001
- 5 J. L. C. Rowsell and O. M. Yaghi, *J Am Chem Soc*, 2006, **128**, 1304–1315.
- 6 A-L Myers and J. M. Prausnitz, *AIChE J*, 1965, **11**, 121–127.
- 7 H. Zeng, M. Xie, Y.-L. Huang, Y. Zhao, X.-J. Xie, J.-P. Bai, M.-Y. Wan, R. Krishna, W. Lu and D. Li, *Angew. Chem., Int. Ed.*, 2019, **58**, 8515–8519.
- 8 Y.-T. Li, J.-W. Zhang, H.-J. Lv, M.-C. Hu, S.-N. Li, Y.-C. Jiang and Q.-G. Zhai, *Inorg. Chem.*, 2020, **59**, 10368–10373.
- 9 L. Liu, Z. Yao, Y. Ye, Y. Yang, Q. Lin, Z. Zhang, M. O'Keeffe and S. Xiang, *J. Am. Chem. Soc.* 2020, **142**, 9258–9266.
- 10 G.-G. Chang, B. Li, H.-L. Wang, T.-L. Hu, Z.-B. Bao and B.-L. Chen, *Chem. Commun.*, 2016, **52**, 3494–3496.
- 11 H.-P. Li, S.-N. Li, X.-Y. Hou, Y.-C. Jiang, M.-C. Hu and Q.-G. Zhai, *Dalton Trans.*, 2018, **47**, 9310–9316.
- 12 X.-X. Wang, L.-L. Yue, P. Zhou, L.-H. Fan and Y.-B. He, *Inorg. Chem.*, 2021, **60**, 17249–17257.

- 13 X. Zhang, H. Cui, R.-B. Lin, R. Krishna, Z.-Y. Zhang, T. Liu, B. Liang and B.-L. Chen, *ACS Appl. Mater. Inter.*, 2021, **13**, 22514–22520.
- 14 J. E. Bachman, D. A. Reed, M. T. Kapelewski, G. Chachra, D. Jonnavittula, G. Radaelli and J.-R. Long, *Energ Environ. Sci.*, 2018, **11**, 2423–2431.
- 15 X. Zhang, H. Cui, R.-B. Lin, R. Krishna, Z.-Y. Zhang, T. Liu, B. Liang and B.-L. Chen, *ACS Appl. Mater. Inter.*, 2021, **13**, 22514–22520.
